# Supplementary material
Source: PubMed Central journal article supplement (PMC4613608)
Supplement: npp201562x2.pdf [file npp201562x2.pdf]

Effects of fatty acid amide hydrolase (FAAH) inhibitors in non-human primate models of nicotine reward and relapse

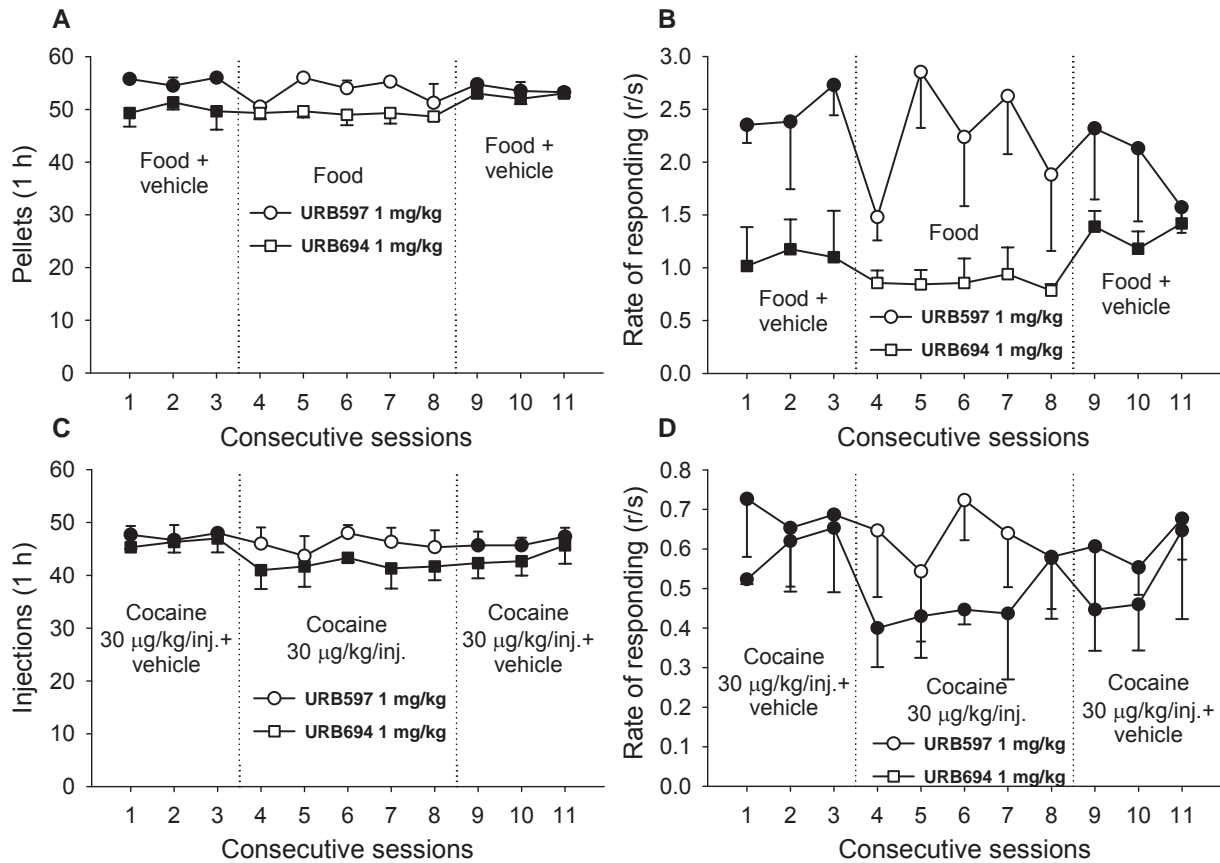

**Supplementary Figure S1.** URB597 or URB694 do not affect self-administration of cocaine or food under fixed-ratio 10 in squirrel monkeys. (A-D) Number of pellets or injections per session and overall rates of responding are shown during food (A, B) or cocaine (C, D; 30  $\mu\text{g}/\text{kg}/\text{inj.}$ ) self-administration (sessions 1-3 and 9-11, vehicle pretreatment) and during the treatment with FAAH inhibitors (sessions 4-8). Points represent means  $\pm$  SEM (n=3-4).
