# Supplementary material
Source: PubMed Central journal article supplement (PMC4613608)
Supplement: npp201562x3.pdf [file npp201562x3.pdf]

Effects of fatty acid amide hydrolase (FAAH) inhibitors in non-human primate models of nicotine reward and relapse

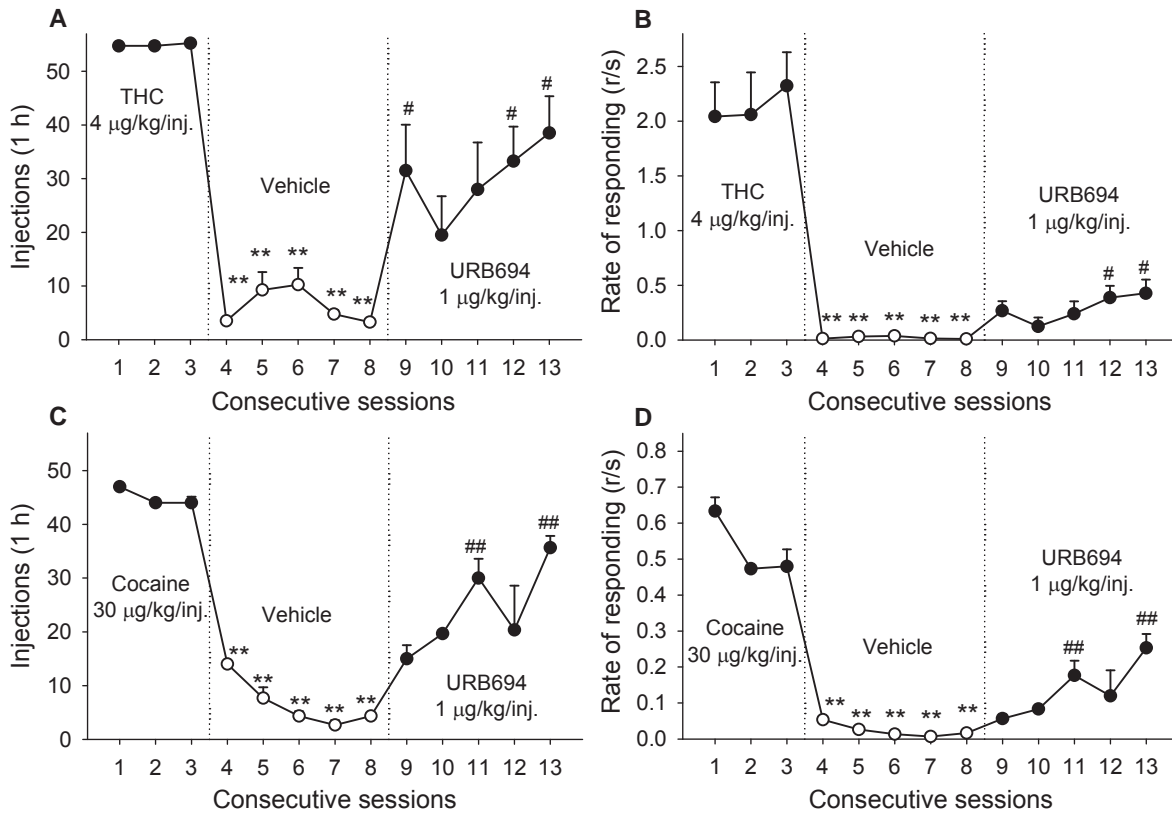

**Supplementary Figure S2.** Self-administration of URB694 under FR10 schedule in

THC- or cocaine-experienced squirrel monkeys. (A-D) Number of injections per session and overall rates of responding during THC (A, B; 4 µg/kg/injection) or cocaine (C, D; 30 µg/kg/injection) self-administration (sessions 1-3), vehicle extinction (sessions 4-8), and URB694 (1 µg/kg/injection) self-administration (sessions 9-13) are shown. Points represent means ± SEM (n=3-4). \**p* < 0.05, \*\**p* < 0.01, *post-hoc* vs. the mean of the last three sessions of THC or cocaine self-administration (sessions 1-3); #*p* < 0.05, ##*p* < 0.01, *post-hoc* vs. the mean of the last three sessions of vehicle extinction (sessions 6-8), Bonferroni test.
