# Supplementary material
Source: PubMed Central journal article supplement (PMC4613608)
Supplement: npp201562x4.pdf [file npp201562x4.pdf]

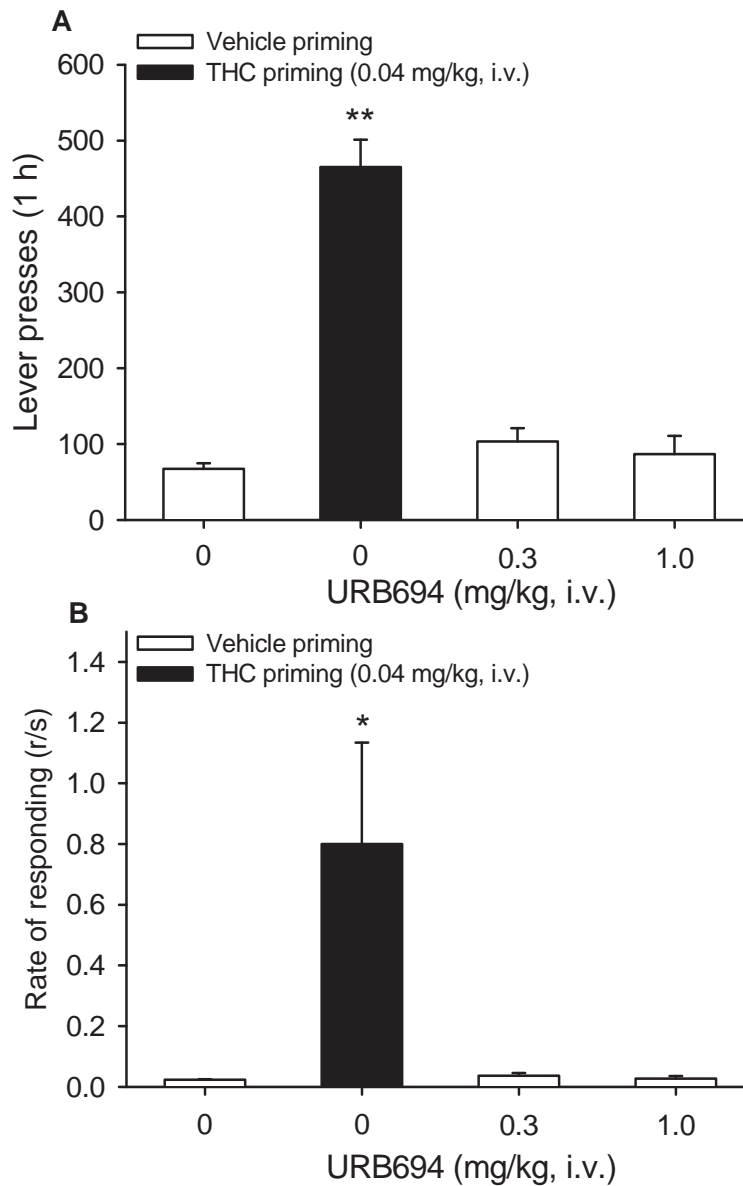

**Supplementary Figure S3.** Reinstatement of extinguished THC seeking behavior by priming injections of THC (0.04 mg/kg, IV), but not by vehicle (0 mg/kg) or URB694 (0.3 or 1 mg/kg, IV 30 minutes before the session). Lever presses produced over 1-h session (A) and overall rates of responding (B) are shown. Bars represent mean  $\pm$  SEM ( $n=3$ ). \* $p < 0.05$ , \*\* $p < 0.01$ , *post-hoc* vs. 'vehicle + vehicle priming' condition, Tukey test.
