# Supplementary material
Source: PubMed Central journal article supplement (PMC4613608)
Supplement: npp201562x5.pdf [file npp201562x5.pdf]

Effects of fatty acid amide hydrolase (FAAH) inhibitors in non-human primate models of nicotine reward and relapse

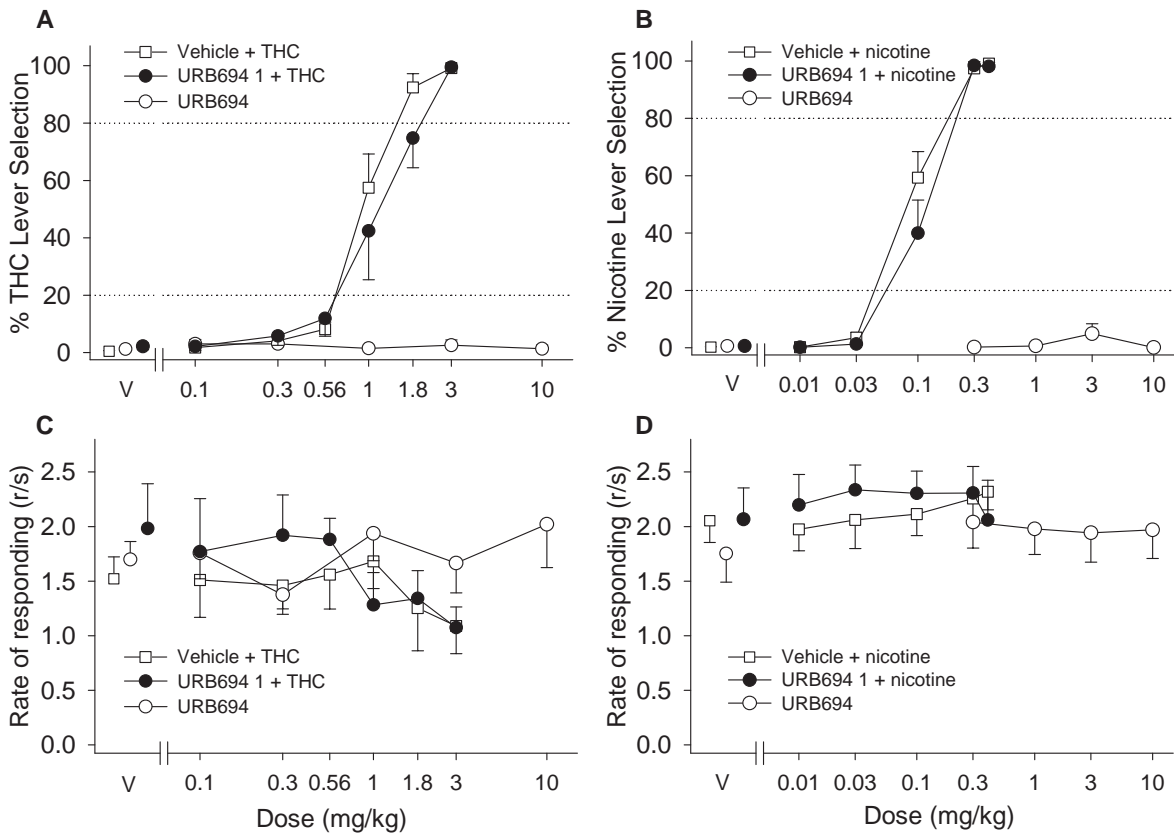

**Supplementary Figure S4.** Discriminative-stimulus effects of URB694 in rats trained to discriminate THC (3 mg/kg, IP 30 min before the session) or nicotine (0.4 mg/kg, SC 10 min before the session) from vehicle. (A-D) Average percentage of responding on the lever associated with THC (A) or nicotine (B) administration and rates of responding (C, D) during the sessions are shown as a function of dose (abscissae log scale). URB694 administered alone (0.1 – 10 mg/kg, IP 40 min before the session) did not produce THC- (A; n=10) or nicotine-like (B; n=10) subjective effects. Pretreatment with URB694 (1 mg/kg, 30 min before training drug) did not shift the dose-response curves for THC (0.1-3 mg/kg; n=6) or nicotine (0.01-0.4 mg/kg; n=9) discrimination. URB694 alone or in combination with THC (C) or nicotine (D) did not affect rates of responding for food pellets in this task. Points represent mean  $\pm$  S.E.M. The symbol “V” represents vehicle.
