# Supplementary material
Source: PubMed Central journal article supplement (PMC4613608)
Supplement: npp201562x6.pdf [file npp201562x6.pdf]

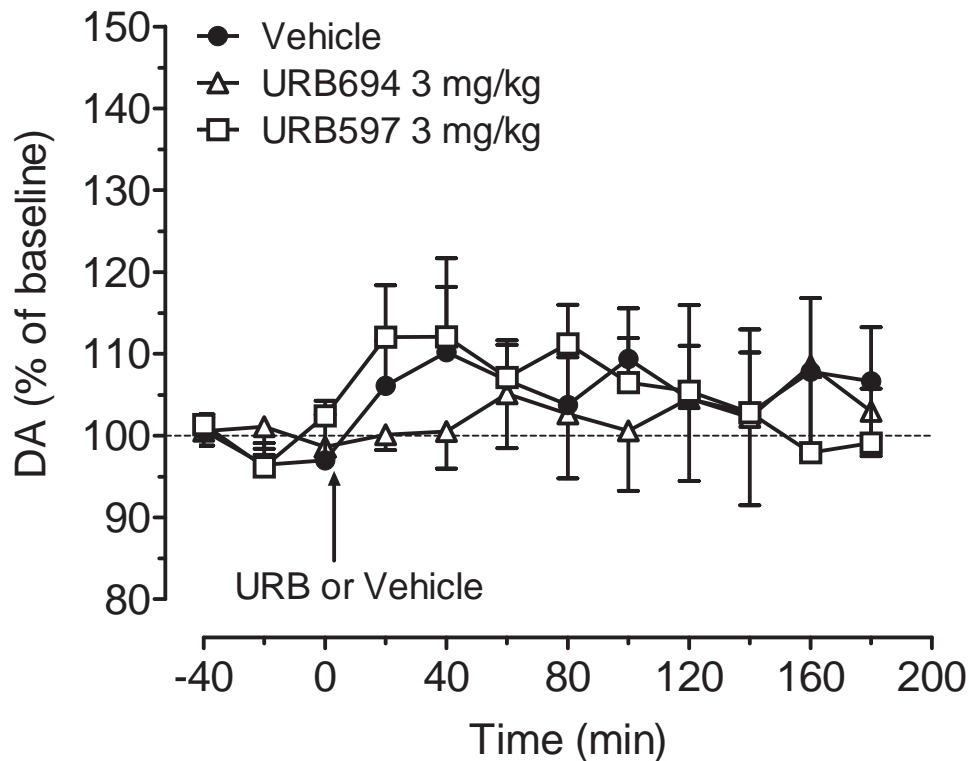

**Supplementary Figure S5.** Effects of treatment with URB597 or URB694 on the extracellular concentration of dopamine in the NAc shell of freely-moving rats. URB597 (3 mg/kg IP, n=5), URB694 (3 mg/kg IP, n=5) or vehicle (n=5) did not significantly changed extracellular dopamine levels in the NAc shell. Arrow indicates time of drug or vehicle administration. Results are expressed as mean ( $\pm$  SEM) percentage of basal values over time.
