# Supplementary material
Source: PubMed Central journal article supplement (PMC4613608)
Supplement: npp201562x7.pdf [file npp201562x7.pdf]

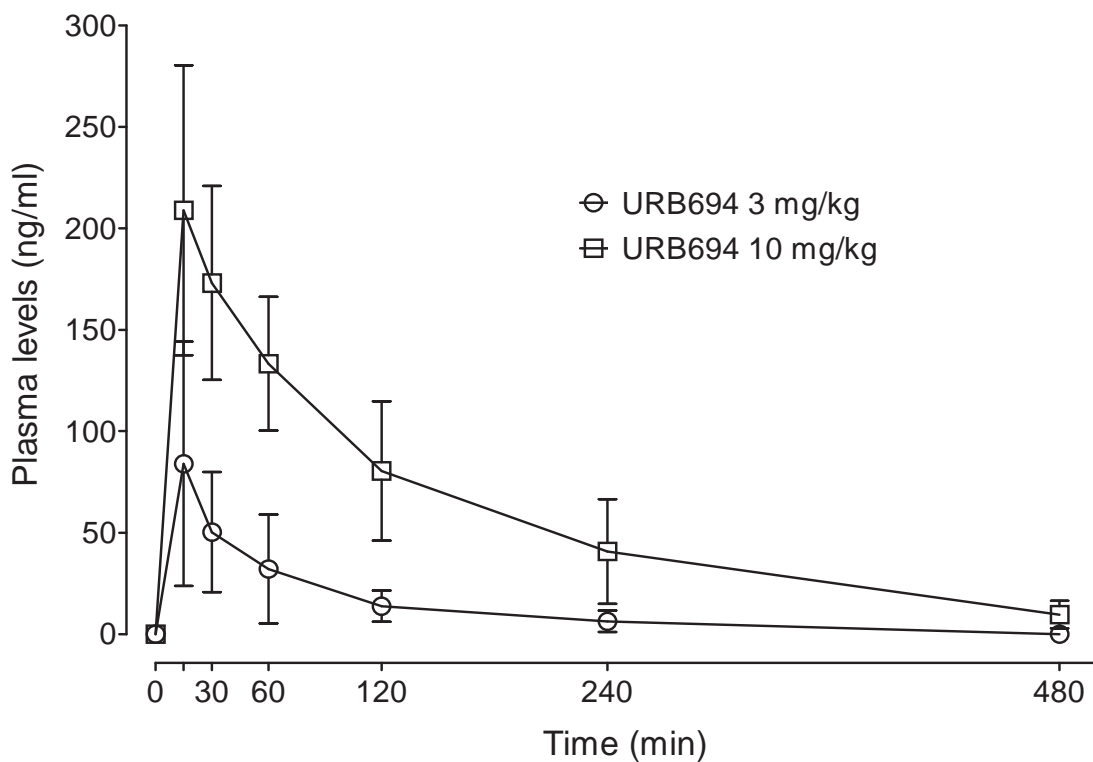

**Supplementary Figure S6.** Plasma concentration profiles following IP administration of URB694 (3 and 10 mg/kg) in rats. Points represent mean  $\pm$  SEM (n=3).
